# Supplementary material
Source: HighWire-hosted journal article supplement (https://drc.bmj.com/content/8/1/e001278)
Supplement: inline-supplementary-material-1 [file inline-supplementary-material-1.pdf]

## ONLINE SUPPLEMENTARY FIGURES

Supplementary Fig. 1

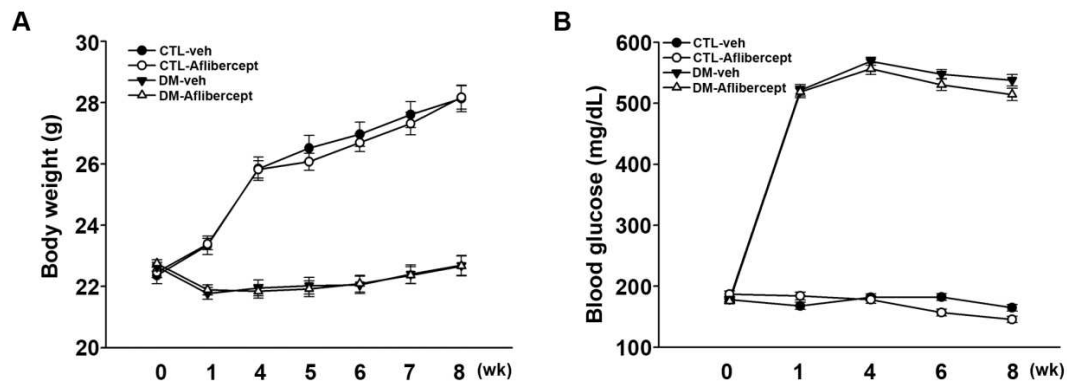

**Figure S1. Changes in mean body weight and blood glucose levels in STZ-induced diabetic mice and control mice.**

(A, B) Body weights and blood glucose levels in diabetic mice. There were no significant differences between aflibercept and saline-treated (veh) mice in both diabetic (DM) and nondiabetic control mice (CTL) at 8 weeks after the induction of diabetes (CTL-veh, n = 37; CTL-Aflibercept, n = 36; DM-veh, n = 68; DM-Aflibercept, n = 79).

## Supplementary Fig. S2

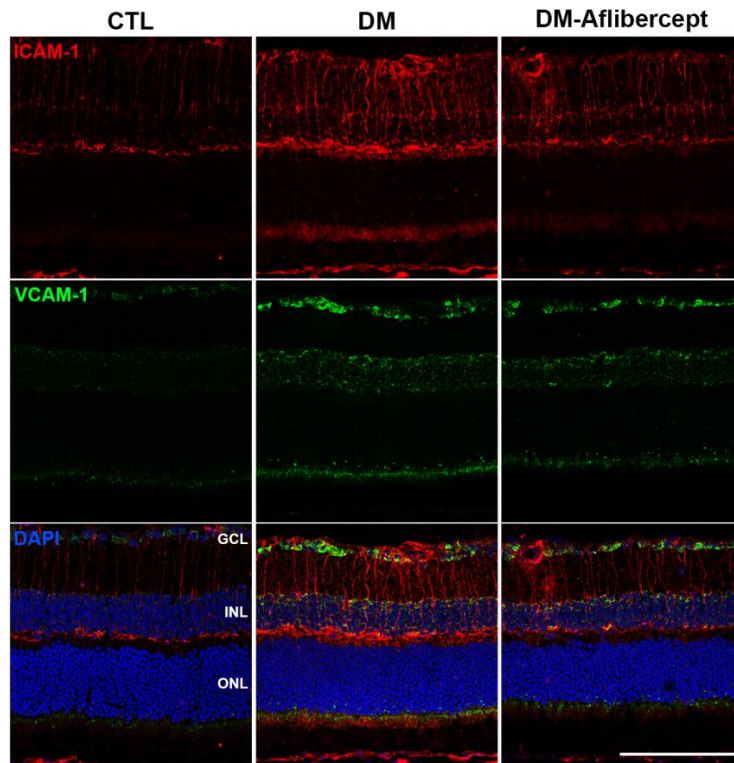

**Figure S2. Changes in the adhesion molecule expression in the diabetic mice retina.**

Changes in the expression of the adhesion molecules, ICAM-1 and VCAM-1. Diabetes-induced increases in ICAM-1 and VCAM-1 expression were attenuated by aflibercept treatment (CTL, n = 2; DM, n = 3; DM-Aflibercept, n = 3). Original magnification:  $\times 400$ ; scale bar: 100  $\mu\text{m}$ .

## Supplementary Fig. 3

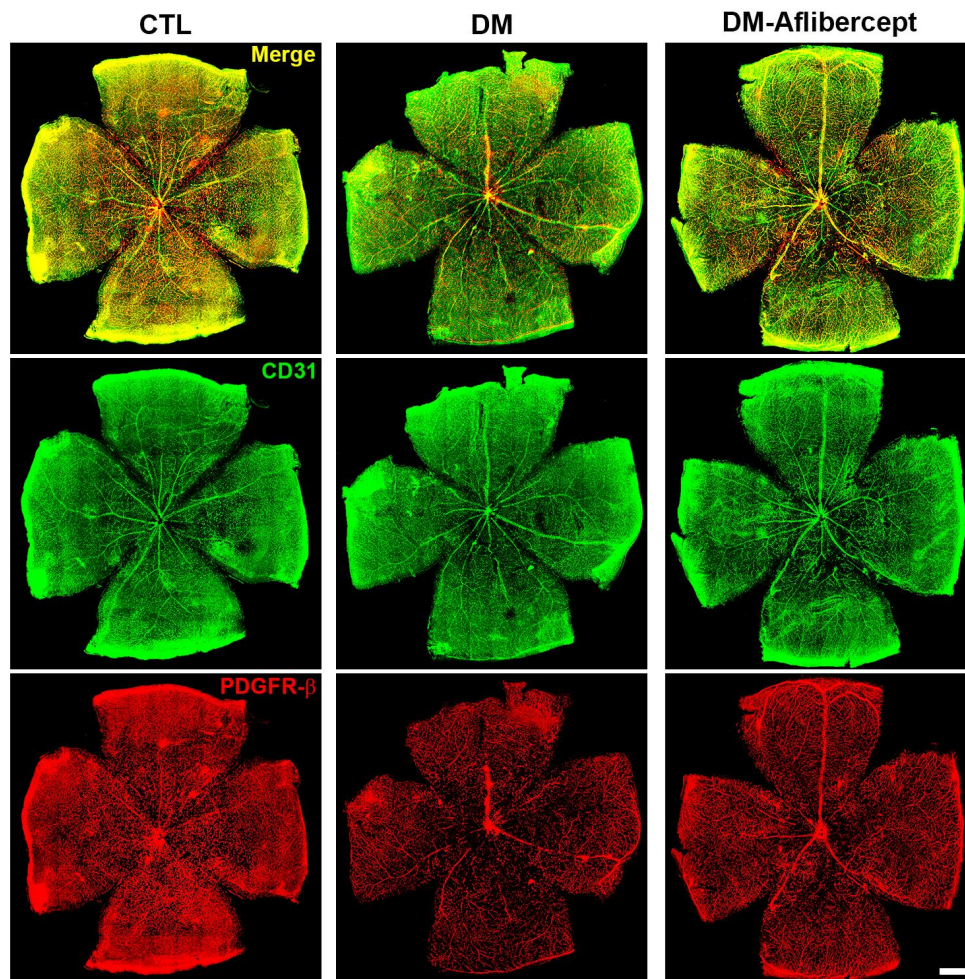

**Figure S3. Immunohistochemistry of pericytes and endothelial cells in the diabetic retina.**

Representative images of PDGFR- $\beta$  staining for retinal pericytes and CD31 staining for endothelial cells. Decreased densities of pericytes were attenuated with aflibercept treatment, while the density of endothelial cells was not significantly different according to aflibercept treatment.
